# Supplementary material
Source: MDPI journal article supplement (https://www.mdpi.com/2073-4395/13/4/1108)

### Sequence logos for the conserved motifs of LuF5H proteins

| No. | Legend | Width (aa) | Sites | LLR  | E-value  |
|-----|--------|------------|-------|------|----------|
| 1   | 1      | 50         | 9     | 1263 | 1.5e-322 |
|     |        |            |       |      |          |
| 2   | 2      | 50         | 9     | 1232 | 9.4e-305 |
|     |        |            |       |      |          |
| 3   | 3      | 50         | 8     | 1144 | 3.7e-286 |
|     |        |            |       |      |          |
| 4   | 4      | 50         | 9     | 1190 | 4.0e-281 |
|     |        |            |       |      |          |
| 5   | 5      | 41         | 8     | 870  | 2.5e-192 |

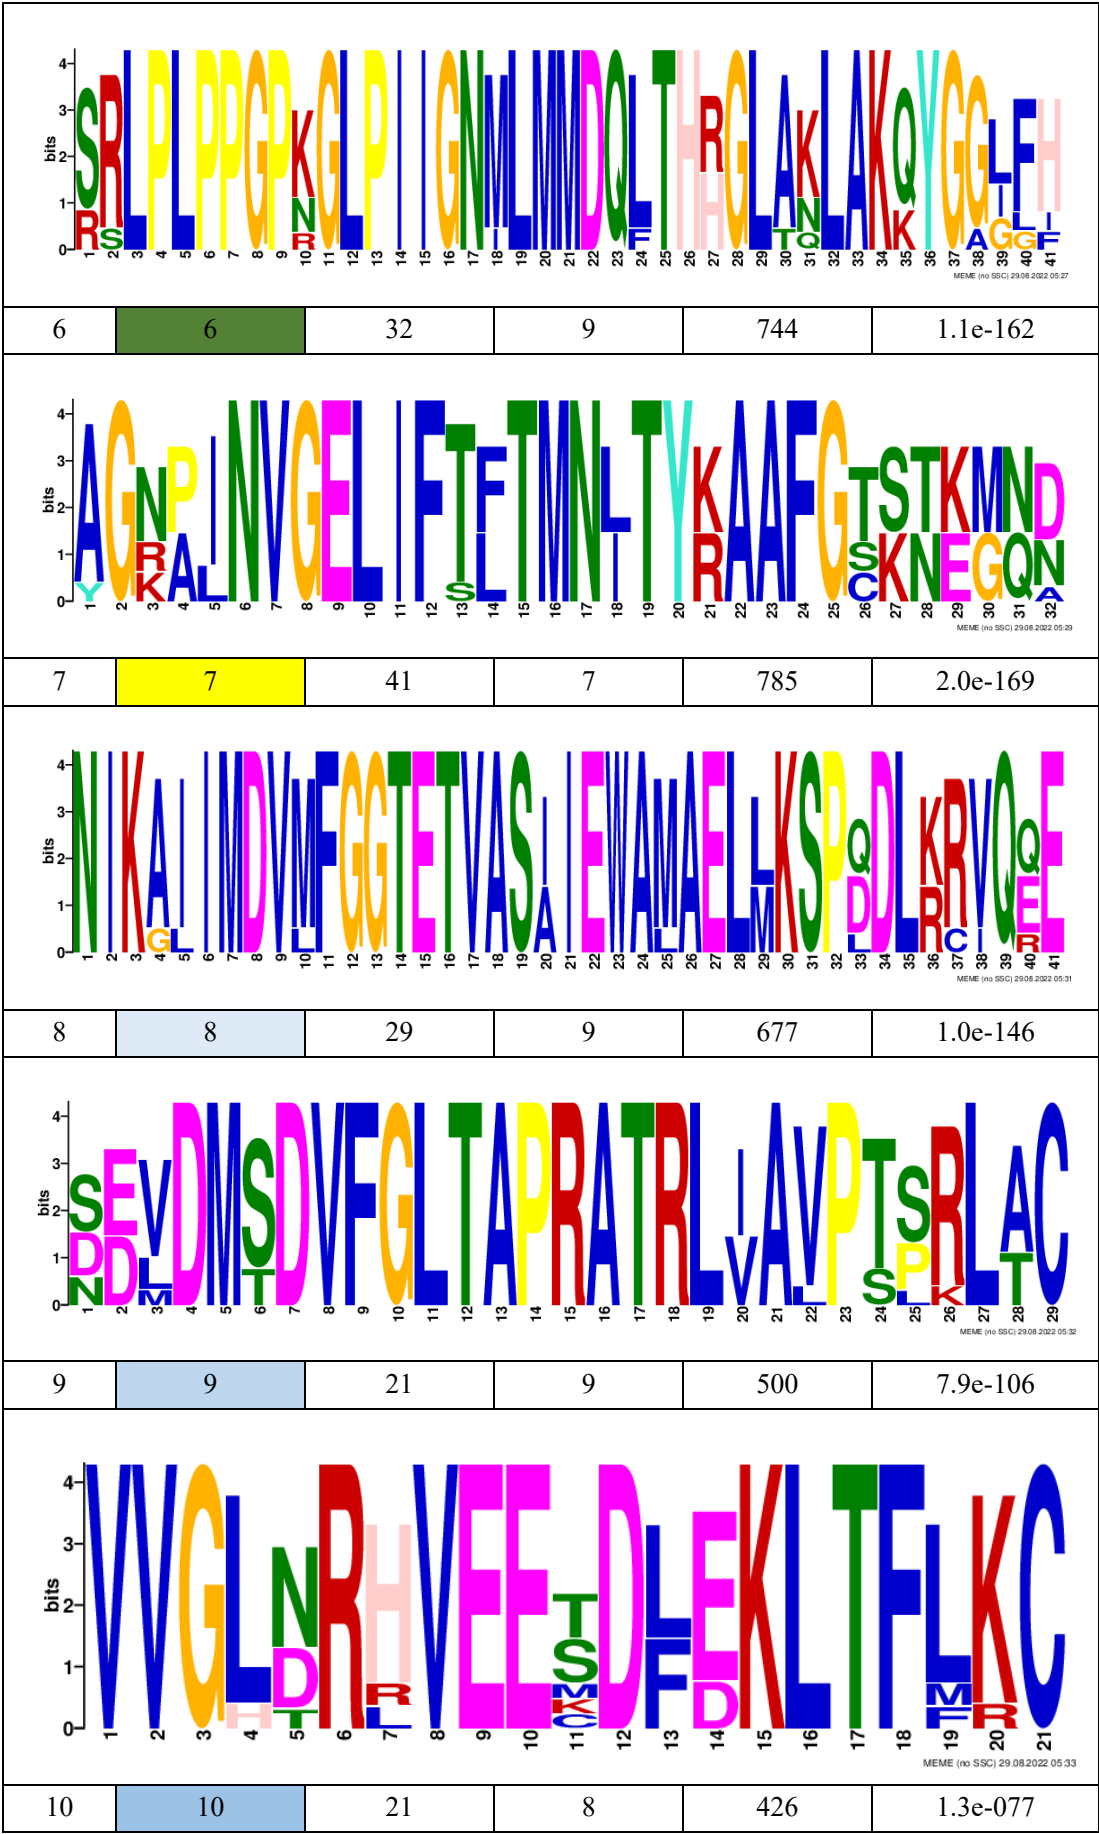

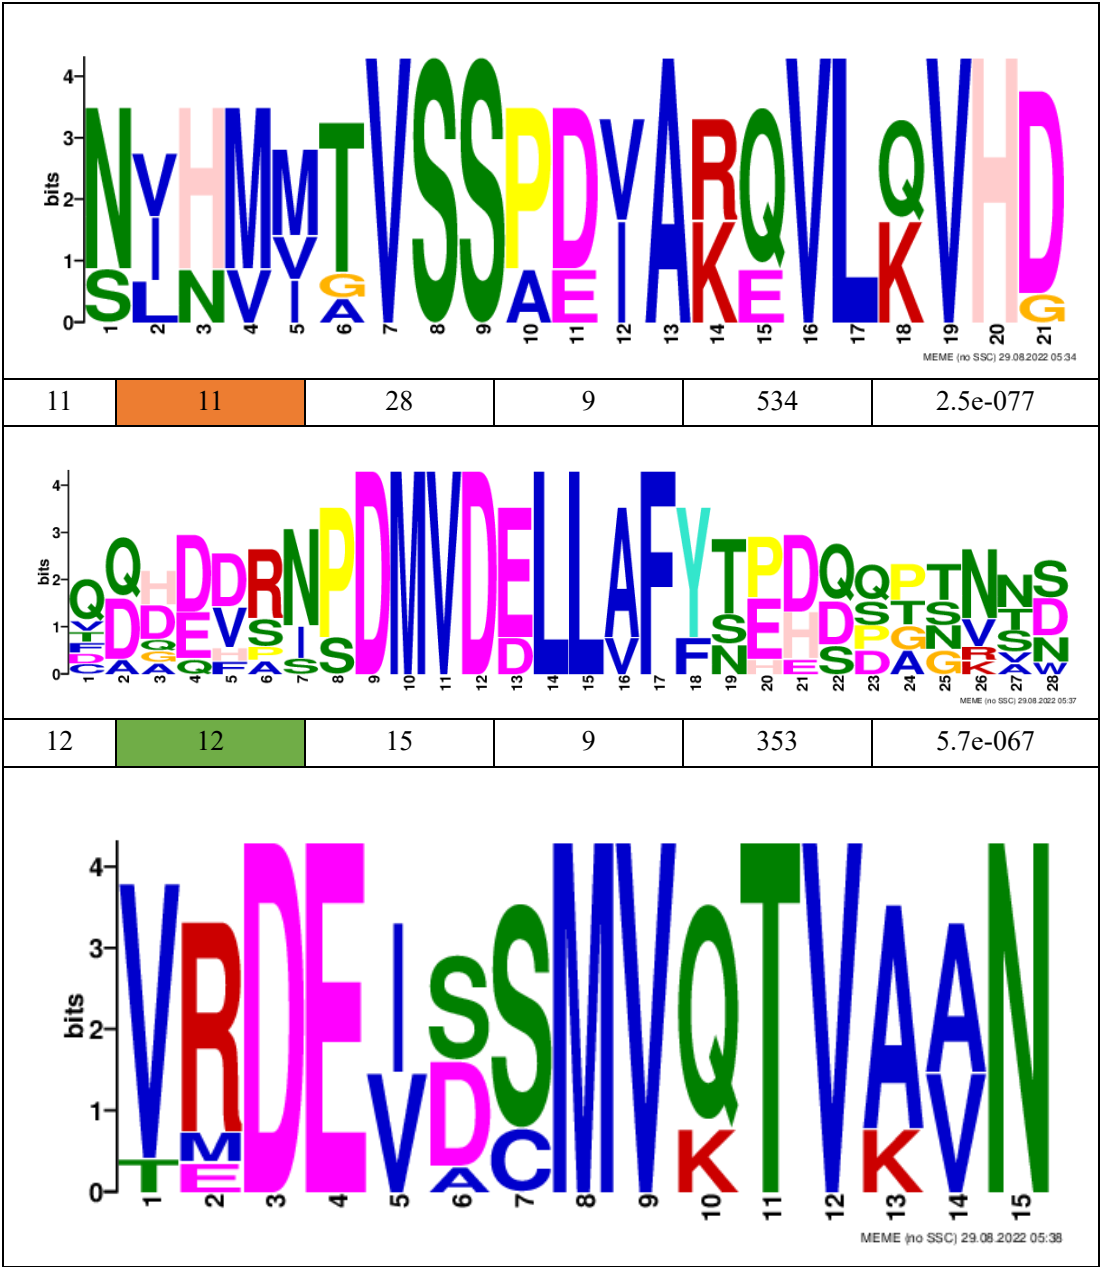

Supplement: s1 [file s1]
